# Supplementary material for: Validation of a Prognostic Score to Identify Hospitalized Patients with COVID-19 at Increased Risk for Bleeding
Source: MDPI journal article supplement (doi:10.3390/v13112278), 2021-11-15
Supplement: s1 [file s1]

**Supplementary Table I. Proportions of patients receiving standard-, intermediate- or therapeutic doses of anticoagulants for thromboprophylaxis in the participating centers.**

| <b>Hospitals</b>                                 | <b>N</b>   | <b>Standard doses</b> | <b>Intermediate doses</b> | <b>Therapeutic doses</b> | <b>Other drugs</b> |
|--------------------------------------------------|------------|-----------------------|---------------------------|--------------------------|--------------------|
| <b><i>Patients, N</i></b>                        | <b>972</b> | <b>280</b>            | <b>412</b>                | <b>280</b>               | <b>123</b>         |
| Hospital Universitario de Fuenlabrada            | 144        | 20 (14%)              | 59 (41%)                  | 31 (21%)                 | 34 (24%)           |
| Hospital Universitario La Paz, Madrid            | 127        | 26 (20%)              | 66 (52%)                  | 34 (27%)                 | 1 (0.8%)           |
| Hospital Germans Trias i Pujol, Badalona         | 124        | 41 (33%)              | 59 (48%)                  | 14 (11%)                 | 10 (8.1%)          |
| Hospital Fundación Jiménez Díaz, Madrid          | 111        | 51 (46%)              | 52 (47%)                  | 8 (7.2%)                 | 0                  |
| Hospital Universitario de Gran Canaria           | 66         | 27 (41%)              | 21 (32%)                  | 9 (14%)                  | 9 (14%)            |
| Complejo Hospitalario de Pontevedra              | 41         | 12 (29%)              | 26 (63%)                  | 3 (7.3%)                 | 0                  |
| Massachusetts General Hospital, US               | 41         | 6 (15%)               | 6 (15%)                   | 0                        | 29 (71%)           |
| Hospital de Cantoblanco, Madrid                  | 37         | 15 (41%)              | 19 (51%)                  | 3 (8.1%)                 | 0                  |
| Hospital Gregorio Marañón, Madrid                | 35         | 6 (17%)               | 6 (17%)                   | 4 (11%)                  | 19 (54%)           |
| Hospital Universitario Vall d'Hebron, Barcelona  | 35         | 16 (46%)              | 2 (5.7%)                  | 16 (46%)                 | 1 (2.9%)           |
| Evanston NorthShore University HealthSystem      | 31         | 0                     | 19 (61%)                  | 6 (19%)                  | 6 (19%)            |
| Hospital Universitari Sagrat Cor, Barcelona      | 27         | 9 (33%)               | 16 (59%)                  | 2 (7.4%)                 | 0                  |
| Hospital General Universitario de Elche          | 23         | 5 (22%)               | 7 (30%)                   | 11 (48%)                 | 0                  |
| Hospital de Galdakao, Bizkaia                    | 22         | 7 (32%)               | 14 (64%)                  | 1 (4.5%)                 | 0                  |
| Hospital Universitario Txagorritxu, Vitoria      | 20         | 1 (5%)                | 19 (95%)                  | 0                        | 0                  |
| Hospital del Mar, Barcelona                      | 11         | 2 (18%)               | 6 (55%)                   | 3 (27%)                  | 0                  |
| Clínica Universidad de Navarra                   | 11         | 8 (73%)               | 1 (9.1%)                  | 2 (18%)                  | 0                  |
| Azienda Ospedaliera Universitaria di Parma       | 10         | 4 (40%)               | 4 (40%)                   | 2 (20%)                  | 0                  |
| Hospital Clínico San Carlos, Madrid              | 9          | 1 (11%)               | 1 (11%)                   | 2 (22%)                  | 5 (56%)            |
| Hospital Universitario Infanta Sofía, Madrid     | 8          | 4 (50%)               | 1 (12%)                   | 1 (12%)                  | 2 (25%)            |
| Hospital Universitario de Salamanca              | 8          | 2 (25%)               | 3 (37%)                   | 2 (25%)                  | 1 (12%)            |
| Hospital Universitario Clínic de Barcelona       | 8          | 4 (50%)               | 2 (25%)                   | 1 (12%)                  | 1 (12%)            |
| Hospital Universitario Rey Juan Carlos, Madrid   | 8          | 2 (25%)               | 0                         | 1 (12%)                  | 5 (62%)            |
| Hospital Universitario de Guadalajara            | 5          | 3 (60%)               | 2 (40%)                   | 0                        | 0                  |
| Hospital Universitario Reina Sofía, Córdoba      | 4          | 3 (75%)               | 1 (25%)                   | 0                        | 0                  |
| Ospedale Buon Consiglio Fatebenefratelli, Napoli | 3          | 3 (100%)              | 0                         | 0                        | 0                  |
| Hospital Universitario Santa Lucía, Cartagena    | 1          | 1 (100%)              | 0                         | 0                        | 0                  |
| Hospital Doctor José Molina Orosa                | 1          | 0                     | 0                         | 1 (100%)                 | 0                  |
| A.O.U Policlinico "G. Martino"                   | 1          | 1 (100%)              | 0                         | 0                        | 0                  |

**Supplementary Table II. Treatments used for thromboprophylaxis.**

|                                            | <b>Standard doses</b> | <b>Intermediate doses</b> | <b>Therapeutic doses</b> | <b>Other drugs</b> |
|--------------------------------------------|-----------------------|---------------------------|--------------------------|--------------------|
| <b>Standard doses,</b>                     | <b>280</b>            | -                         | -                        | -                  |
| Enoxaparin 40 mg daily                     | 184 (66%)             | -                         | -                        | -                  |
| Bemiparin 2,500-3,500 IU daily             | 59 (21%)              | -                         | -                        | -                  |
| Biosimilars of enoxaparin 40 mg daily      | 15 (5.4%)             | -                         | -                        | -                  |
| Tinzaparin 2,500-4,500 IU daily            | 10 (3.6%)             | -                         | -                        | -                  |
| Apixaban 5 mg daily                        | 8 (2.9%)              | -                         | -                        | -                  |
| Fondaparinux 2.5 mg daily                  | 5 (1.8%)              | -                         | -                        | -                  |
|                                            |                       |                           |                          | -                  |
| <b>Intermediate doses,</b>                 | -                     | <b>412</b>                | -                        | -                  |
| Enoxaparin 60-100 mg daily                 | -                     | 334 (81%)                 | -                        | -                  |
| Biosimilars of enoxaparin 60- 100 mg daily | -                     | 38 (9.2%)                 | -                        | -                  |
| Bemiparin 5,000-7,500 IU daily             | -                     | 27 (6.6%)                 | -                        | -                  |
| Apixaban 10 mg daily                       | -                     | 6 (1.5%)                  | -                        | -                  |
| Fondaparinux 5.0 mg daily                  | -                     | 4 (1.0%)                  | -                        | -                  |
| Edoxaban 30 mg daily                       | -                     | 2 (0.5%)                  | -                        | -                  |
| Rivaroxaban 10 mg daily                    | -                     | 1 (0.2%)                  | -                        | -                  |
|                                            |                       |                           |                          |                    |
| <b>Therapeutic doses,</b>                  |                       |                           | <b>157</b>               | -                  |
| Enoxaparin 120- 220 mg daily               | -                     | -                         | 121 (77%)                | -                  |
| Bemiparin 10,000-12,500 IU daily           | -                     | -                         | 13 (8.3%)                | -                  |
| Biosimilars enoxaparin 120- 220 mg daily   | -                     | -                         | 6 (3.8%)                 | -                  |
| Tinzaparin 10,000-14,000 IU daily          | -                     | -                         | 6 (3.8%)                 | -                  |
| Fondaparinux 7.5 mg daily                  | -                     | -                         | 6 (3.8%)                 | -                  |
| Rivaroxaban 20 mg daily                    | -                     | -                         | 2 (1.3%)                 | -                  |
| Dabigatran 220 mg daily                    | -                     | -                         | 2 (1.3%)                 | -                  |
| Edoxaban 60 mg daily                       | -                     | -                         | 1 (0.6%)                 | -                  |
|                                            |                       |                           |                          |                    |
| <b>Other drugs,</b>                        | -                     | -                         | -                        | <b>123</b>         |
| Unfractionated heparin                     | -                     | -                         | -                        | 68 (55%)           |
| Vitamin K antagonists                      | -                     | -                         | -                        | 55 (45%)           |
|                                            |                       |                           |                          |                    |

**Abbreviations:** IU, international units.

**Supplementary Table III. STROBE statement (part I)**

| Supplementary Table III: STROBE Statement (part 1) |         |                                                                                                                                                                                                |
|----------------------------------------------------|---------|------------------------------------------------------------------------------------------------------------------------------------------------------------------------------------------------|
|                                                    | Item No | Recommendation                                                                                                                                                                                 |
| Title and abstract                                 | 1       | (a) Indicate the study's design with a commonly used term in the title or the abstract PAGE 1                                                                                                  |
|                                                    |         | (b) Provide in the abstract an informative and balanced summary of what was done and what was found PAGE 2                                                                                     |
| Introduction                                       |         |                                                                                                                                                                                                |
| Background/rationale                               | 2       | Explain the scientific background and rationale for the investigation being reported PAGES 3-4                                                                                                 |
| Objectives                                         | 3       | State specific objectives, including any prespecified hypotheses PAGE 4                                                                                                                        |
| Methods                                            |         |                                                                                                                                                                                                |
| Study design                                       | 4       | Present key elements of study design early in the paper PAGES 4-5                                                                                                                              |
| Setting                                            | 5       | Describe the setting, locations, and relevant dates, including periods of recruitment, exposure, follow-up, and data collection PAGES 4-5                                                      |
| Participants                                       | 6       | (a) Cohort study—Give the eligibility criteria, and the sources and methods of selection of participants. Describe methods of follow-up PAGES 4-5                                              |
| Variables                                          | 7       | Clearly define all outcomes, exposures, predictors, potential confounders, and effect modifiers. Give diagnostic criteria, if applicable PAGES 5-6                                             |
| Data sources/measurement                           | 8*      | For each variable of interest, give sources of data and details of methods of assessment (measurement). Describe comparability of assessment methods if there is more than one group PAGES 5-6 |
| Bias                                               | 9       | Describe any efforts to address potential sources of bias PAGES 4-6                                                                                                                            |
| Study size                                         | 10      | Explain how the study size was arrived at PAGE 4                                                                                                                                               |
| Quantitative variables                             | 11      | Explain how quantitative variables were handled in the analyses. If applicable, describe which groupings were chosen and why PAGE 6                                                            |
| Statistical methods                                | 12      | (a) Describe all statistical methods, including those used to control for confounding PAGE 6                                                                                                   |
|                                                    |         | (b) Describe any methods used to examine subgroups and interactions PAGE 6                                                                                                                     |
|                                                    |         | (c) Explain how missing data were addressed PAGE 6                                                                                                                                             |
|                                                    |         | (d) Cohort study—If applicable, explain how loss to follow-up was addressed PAGE 6                                                                                                             |
|                                                    |         | (e) Describe any sensitivity analyses                                                                                                                                                          |

**Supplementary Table IV. STROBE statement (part II)**

|                          |     |                                                                                                                                                                                                                                    |
|--------------------------|-----|------------------------------------------------------------------------------------------------------------------------------------------------------------------------------------------------------------------------------------|
| <b>Results</b>           |     |                                                                                                                                                                                                                                    |
| Participants             | 13* | (a) Report numbers of individuals at each stage of study—eg numbers potentially eligible, examined for eligibility, confirmed eligible, included in the study, completing follow-up, and analysed PAGE 7 and Supplementary Table I |
|                          |     | (b) Give reasons for non-participation at each stage                                                                                                                                                                               |
|                          |     | (c) Consider use of a flow diagram                                                                                                                                                                                                 |
| Descriptive data         | 14* | (a) Give characteristics of study participants (eg demographic, clinical, social) and information on exposures and potential confounders Table I                                                                                   |
|                          |     | (b) Indicate number of participants with missing data for each variable of interest not reported                                                                                                                                   |
|                          |     | (c) <i>Cohort study</i> —Summarise follow-up time (eg, average and total amount) Table I                                                                                                                                           |
| Outcome data             | 15* | <i>Cohort study</i> —Report numbers of outcome events or summary measures over time Table I                                                                                                                                        |
| Main results             | 16  | (a) Give unadjusted estimates and, if applicable, confounder-adjusted estimates and their precision (eg, 95% confidence interval). Make clear which confounders were adjusted for and why they were included Table II              |
|                          |     | (b) Report category boundaries when continuous variables were categorized                                                                                                                                                          |
|                          |     | (c) If relevant, consider translating estimates of relative risk into absolute risk for a meaningful time period                                                                                                                   |
| Other analyses           | 17  | Report other analyses done—eg analyses of subgroups and interactions, and sensitivity analyses Table IV, and figures 1 and 2.                                                                                                      |
| <b>Discussion</b>        |     |                                                                                                                                                                                                                                    |
| Key results              | 18  | Summarise key results with reference to study objectives<br>PAGE 8                                                                                                                                                                 |
| Limitations              | 19  | Discuss limitations of the study, taking into account sources of potential bias or imprecision. Discuss both direction and magnitude of any potential bias PAGE 9                                                                  |
| Interpretation           | 20  | Give a cautious overall interpretation of results considering objectives, limitations, multiplicity of analyses, results from similar studies, and other relevant evidence PAGE 10                                                 |
| Generalisability         | 21  | Discuss the generalisability (external validity) of the study results PAGE 10                                                                                                                                                      |
| <b>Other information</b> |     |                                                                                                                                                                                                                                    |
| Funding                  | 22  | Give the source of funding and the role of the funders for the present study and, if applicable, for the original study on which the present article is based. PAGE 10.                                                            |
